# Supplementary material
Source: PubMed Central journal article supplement (PMC7900815)
Supplement: SMJ-61-14.pdf [file SMJ-61-14.pdf]

## SINGAPORE MEDICAL COUNCIL CATEGORY 3B CME PROGRAMME

(Code SMJ 202001A)

**Question 1.** Chest radiograph features consistent with congestive heart failure include:

- (a) Alveolar oedema (bat's wing opacities).
- (b) Interstitial (Kerley B) lines.
- (c) Cardiomegaly.
- (d) Dilated upper lobe pulmonary vessels.

| True                     | False                    |
|--------------------------|--------------------------|
| <input type="checkbox"/> | <input type="checkbox"/> |

**Question 2.** Regarding digoxin:

- (a) It is shown to have mortality benefits in patients with heart failure.
- (b) It reduces the rate of hospitalisation in patients with heart failure.
- (c) It is a first-line drug in the management of heart failure.
- (d) It increases vagal tone for both sinoatrial and atrioventricular (AV) nodes.

|                          |                          |
|--------------------------|--------------------------|
| <input type="checkbox"/> | <input type="checkbox"/> |

**Question 3.** Electrocardiographic features of digoxin toxicity include:

- (a) Reverse-tick ST segment.
- (b) Atrial fibrillation.
- (c) Bidirectional ventricular tachycardia.
- (d) AV blocks.

|                          |                          |
|--------------------------|--------------------------|
| <input type="checkbox"/> | <input type="checkbox"/> |

**Question 4.** Symptoms that may suggest digoxin toxicity include:

- (a) Palpitations.
- (b) Confusion.
- (c) Yellow-green disturbance of colour vision.
- (d) Gastrointestinal symptoms (nausea, vomiting and diarrhoea).

|                          |                          |
|--------------------------|--------------------------|
| <input type="checkbox"/> | <input type="checkbox"/> |

**Question 5.** Drugs that are commonly associated with increased risk of digoxin toxicity include:

- (a) Amiodarone.
- (b) Erythromycin.
- (c) Thyroxine.
- (d) Verapamil.

|                          |                          |
|--------------------------|--------------------------|
| <input type="checkbox"/> | <input type="checkbox"/> |

### Doctor's particulars:

Name in full: \_\_\_\_\_ MCR no.: \_\_\_\_\_  
 Specialty: \_\_\_\_\_ Email: \_\_\_\_\_

#### SUBMISSION INSTRUCTIONS:

Visit the SMJ website: <http://www.smj.org.sg/current-issue> and select the appropriate quiz. You will be redirected to the SMA login page.

**For SMA member:** (1) Log in with your username and password (if you do not know your password, please click on 'Forgot your password?'). (2) Select your answers for each quiz and click 'Submit'.

**For non-SMA member:** (1) Create an SMJ CME account, or log in with your SMJ CME username and password (for returning users). (2) Make payment of SGD 21.40 (inclusive of 7% GST) via PayPal to access this month's quizzes. (3) Select your answers for each quiz and click 'Submit'.

#### RESULTS:

(1) Answers will be published online in the SMJ March 2020 issue. (2) The MCR numbers of successful candidates will be posted online at the SMJ website by 12 March 2020. (3) Passing mark is 60%. No mark will be deducted for incorrect answers. (4) The SMJ editorial office will submit the list of successful candidates to the Singapore Medical Council. (5) One CME point is awarded for successful candidates. (6) SMC credits CME points according to the month of publication of the CME article (i.e. points awarded for a quiz published in the January 2020 issue will be credited for the month of January 2020, even if the deadline is in March 2020).

**Deadline for submission: (January 2020 SMJ 3B CME programme): 12 noon, 5 March 2020.**
